# Supplementary material
Source: MDPI journal article supplement (https://www.mdpi.com/2073-4441/12/2/595)
Supplement: s1 [file s1]

# Electrocoagulation: A promising method to treat and reuse mineral processing wastewater with high COD

Gaogui Jing<sup>1,2</sup>, Shuai Ren<sup>1,2</sup>, Yuesheng Gao<sup>3</sup>, Wei Sun<sup>1,2</sup>, Zhiyong Gao<sup>1,2,\*</sup>

<sup>1</sup> School of Minerals Processing and Bioengineering, Central South University, Changsha 410083, China

<sup>2</sup> Key Laboratory of Hunan Province for Clean and Efficient Utilization of Strategic Calcium-containing Mineral Resources, Central South University, Changsha 410083, China

<sup>3</sup>Department of Chemical Engineering, Michigan Technological University, Houghton 49931, United States

The so-called peroxi-electrocoagulation (PEC) externally is adding H<sub>2</sub>O<sub>2</sub> in electrochemical reactor with iron anode plate [1]. Fe<sup>2+</sup> produced from the sacrificial of iron anode and H<sub>2</sub>O<sub>2</sub> can generate a powerful oxidants named hydroxyl radicals (OH·) during PEC process. Because of the instable of H<sub>2</sub>O<sub>2</sub> at a basic region [2], an initial pH of 3.0 was adopted in the process. Unexpectedly, as it can be seen from Fig. S1, the efficiency of electrocoagulation gradually decreases with the increasing H<sub>2</sub>O<sub>2</sub> dosage and the lowest efficiency is obtained at 563.31mg/L. But the further increasing of H<sub>2</sub>O<sub>2</sub> dosage results in the increase of electrocoagulation efficiency. The addition of H<sub>2</sub>O<sub>2</sub> has positive effect on COD removal only above 563.31mg/L.

At this stage, significant differences of flocs settling velocity are observed and the variation of flocs settling velocity with the dosage of H<sub>2</sub>O<sub>2</sub> is shown in the Fig. S2. In a reversal trends with electrocoagulation efficiency, the fastest settling velocity of flocs is obtained at 563.31mg/L H<sub>2</sub>O<sub>2</sub> concentration. The experiments prove that excessive settling velocity may result in low COD removal efficiency. The experimental phenomenon after 6 hours sedimentation is shown in the insert graph. It is evident that the height of final boundary between mud and water also show a decline first followed by a upswing.

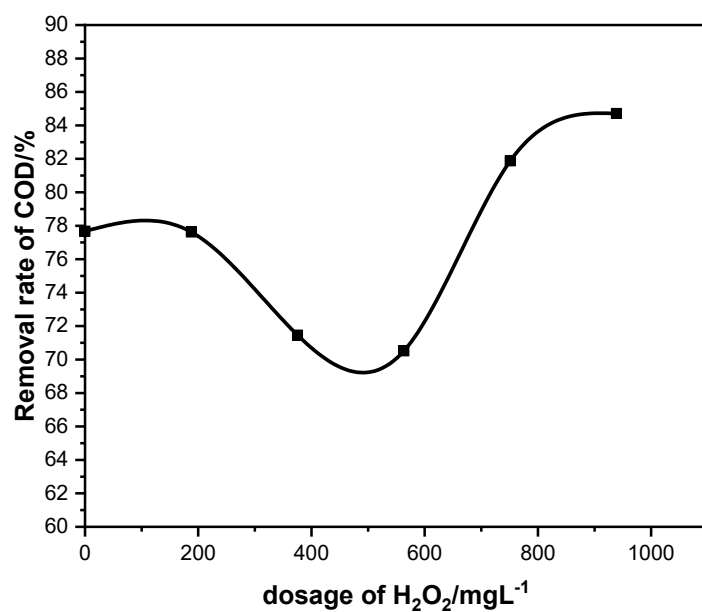

Fig S1. Variation of COD removal rate with dosage of  $H_2O_2$  (Anode material: Fe, Cathode material: Stainless steel, Current density: 19.23 mA/cm<sup>2</sup>, pH: 3.0, Electrolysis time: 70 min).

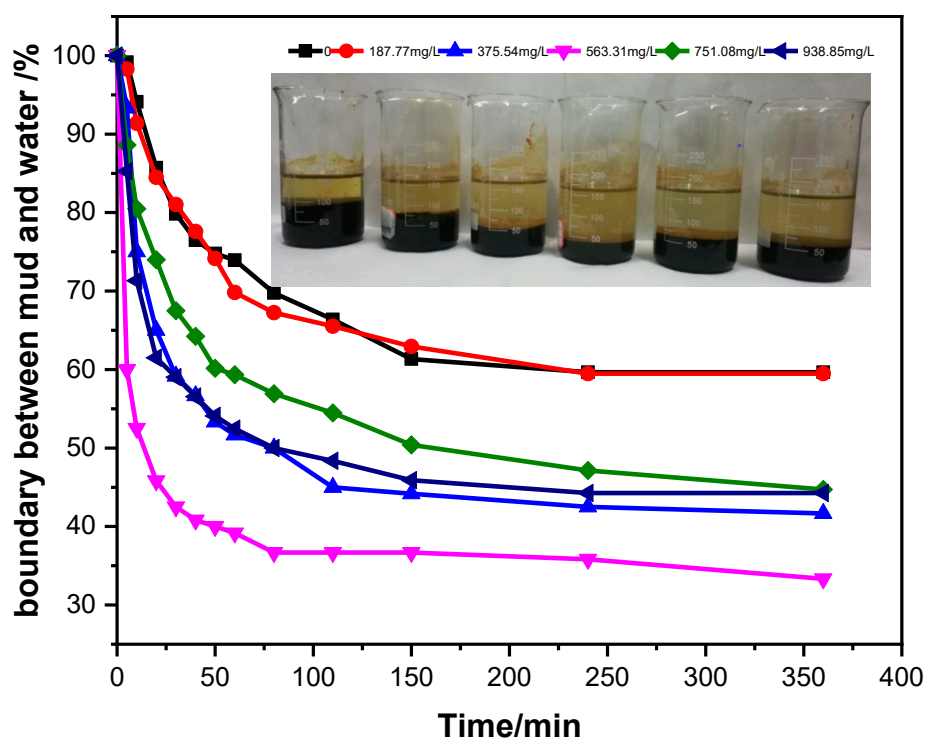

Fig S2. Effect of  $H_2O_2$  on the boundary between mud and water.

**Table S1.** Flotation tests results with fresh water

| Product        | Weight (g) | Yield (%) | Recovery (%) |        | Grade (%) |       |
|----------------|------------|-----------|--------------|--------|-----------|-------|
|                |            |           | Pb           | Zn     | Pb        | Zn    |
| Pb concentrate | 13.51      | 1.80      | 30.54        | 0.21   | 71.73     | 0.84  |
| midding 1      | 27.11      | 3.62      | 40.76        | 0.96   | 47.71     | 1.89  |
| midding 2      | 9.96       | 1.33      | 3.87         | 1.00   | 12.33     | 5.36  |
| midding 3      | 53.12      | 7.09      | 10.63        | 5.85   | 6.35      | 5.89  |
| midding 4      | 22.46      | 3.00      | 3.36         | 2.82   | 4.74      | 6.73  |
| Zn concentrate | 64.46      | 8.60      | 1.52         | 68.61  | 0.75      | 56.96 |
| midding 5      | 29.7       | 3.96      | 2.52         | 13.41  | 2.69      | 24.17 |
| midding 6      | 31.72      | 4.23      | 1.67         | 0.87   | 1.67      | 1.47  |
| midding 7      | 31.01      | 4.14      | 1.90         | 3.47   | 1.94      | 5.99  |
| tailing        | 466.57     | 62.24     | 3.23         | 2.79   | 0.22      | 0.32  |
| total          | 749.62     | 100.00    | 100.00       | 100.00 |           |       |

**Table S2.** Flotation tests results with mixed wastewater

| Product        | Weight (g) | Yield (%) | Recovery (%) |        | Grade (%) |       |
|----------------|------------|-----------|--------------|--------|-----------|-------|
|                |            |           | Pb           | Zn     | Pb        | Zn    |
| Pb concentrate | 13.73      | 1.83      | 25.01        | 0.35   | 57.62     | 1.37  |
| midding 1      | 41.02      | 5.46      | 53.36        | 1.84   | 41.14     | 2.42  |
| midding 2      | 9.21       | 1.23      | 1.57         | 1.06   | 5.39      | 6.2   |
| midding 3      | 47.52      | 6.32      | 4.54         | 5.60   | 3.02      | 6.36  |
| midding 4      | 34.58      | 4.60      | 6.83         | 3.97   | 6.25      | 6.2   |
| Zn concentrate | 56.85      | 7.56      | 1.17         | 59.99  | 0.65      | 56.96 |
| midding 5      | 14.19      | 1.89      | 0.73         | 4.53   | 1.62      | 17.24 |
| midding 6      | 36.52      | 4.86      | 1.87         | 1.67   | 1.62      | 2.47  |
| midding 7      | 35.76      | 4.76      | 1.71         | 15.60  | 1.51      | 23.54 |
| tailing        | 462.15     | 61.49     | 3.21         | 5.39   | 0.22      | 0.63  |
| total          | 751.53     | 100.00    | 100.00       | 100.00 |           |       |

**Table S3.** Flotation tests results with treated water

| Product        | Weight (g) | Yield (%) | Recovery (%) |        | Grade (%) |       |
|----------------|------------|-----------|--------------|--------|-----------|-------|
|                |            |           | Pb           | Zn     | Pb        | Zn    |
| Pb concentrate | 21.08      | 2.82      | 36.06        | 0.47   | 51.91     | 1.21  |
| midding 1      | 44.04      | 5.89      | 48.85        | 2.67   | 33.66     | 3.26  |
| midding 2      | 11.91      | 1.59      | 1.35         | 1.52   | 3.45      | 6.88  |
| midding 3      | 42.64      | 5.71      | 3.55         | 5.00   | 2.53      | 6.31  |
| midding 4      | 19.02      | 2.55      | 2.19         | 2.49   | 3.5       | 7.04  |
| Zn concentrate | 62.47      | 8.36      | 0.66         | 65.33  | 0.32      | 56.33 |
| midding 5      | 22.67      | 3.03      | 1.40         | 11.68  | 1.88      | 27.75 |
| midding 6      | 26.82      | 3.59      | 1.10         | 0.94   | 1.24      | 1.89  |
| midding 7      | 26.73      | 3.58      | 1.43         | 4.85   | 1.62      | 9.77  |
| tailing        | 469.93     | 62.88     | 3.41         | 5.06   | 0.22      | 0.58  |
| total          | 747.31     | 100.00    | 100.00       | 100.00 |           |       |

## References

1. Yüksel E, ŞEngiL IA, Özacar M. The removal of sodium dodecyl sulfate in synthetic wastewater by peroxi-electrocoagulation method. *Chemical Engineering Journal* **2009**;152, 347-53.
2. Nidheesh PV, Gandhimathi R. Trends in electro-Fenton process for water and wastewater treatment: An overview. *Desalination* **2012**; 299, 1-15.
